# Supplementary material for: Depolarization of sperm membrane potential is a common feature of men with subfertility and is associated with low fertilization rate at IVF
Source: PubMed Central journal article supplement (PMC4871192; doi:10.1093/humrep/dew056), 2016-04-06
Supplement: supp_dew056_dew056supp_fig1.pdf [file supp_dew056_dew056supp_fig1.pdf]

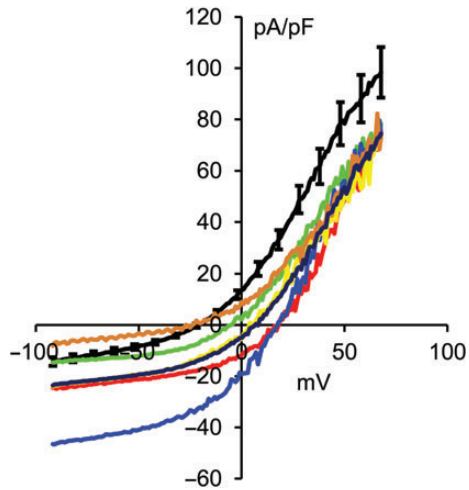

**Supplementary Figure S1** Cells from Patient C vary in their currents induced by ramp depolarization. Mean donor sperm data are shown in black for reference.
