# Supplementary material for: Depolarization of sperm membrane potential is a common feature of men with subfertility and is associated with low fertilization rate at IVF
Source: PubMed Central journal article supplement (PMC4871192; doi:10.1093/humrep/dew056), 2016-04-06
Supplement: supp_dew056_dew056supp_fig2.pdf [file supp_dew056_dew056supp_fig2.pdf]

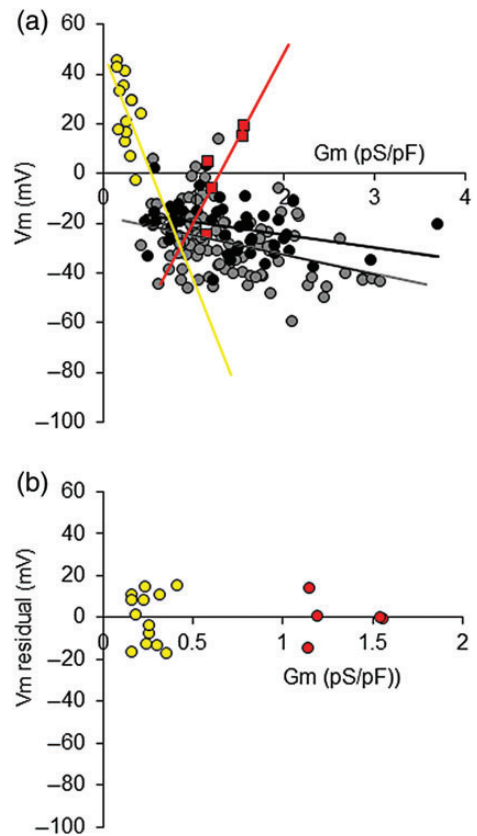

**Supplementary Figure S2** (a) Scatter plot of membrane conductance ( $G_m$ ) versus resting membrane potential ( $V_m$ ) for individual cells from capacitated donors (black symbols), Patient C (red symbols), Patient D (yellow symbols) and all other IVF patients (grey symbols). Regression lines are presented in matching colours ( $P < 0.1$ , Patient C). (b) Residual plots for regressions fitted to data from patients C (red) and D (yellow). Points are randomly scattered consistent with a linear fit.
