# Supplementary material for: Depolarization of sperm membrane potential is a common feature of men with subfertility and is associated with low fertilization rate at IVF
Source: PubMed Central journal article supplement (PMC4871192; doi:10.1093/humrep/dew056), 2016-04-06
Supplement: supp_dew056_dew056supp_fig3.pdf [file supp_dew056_dew056supp_fig3.pdf]

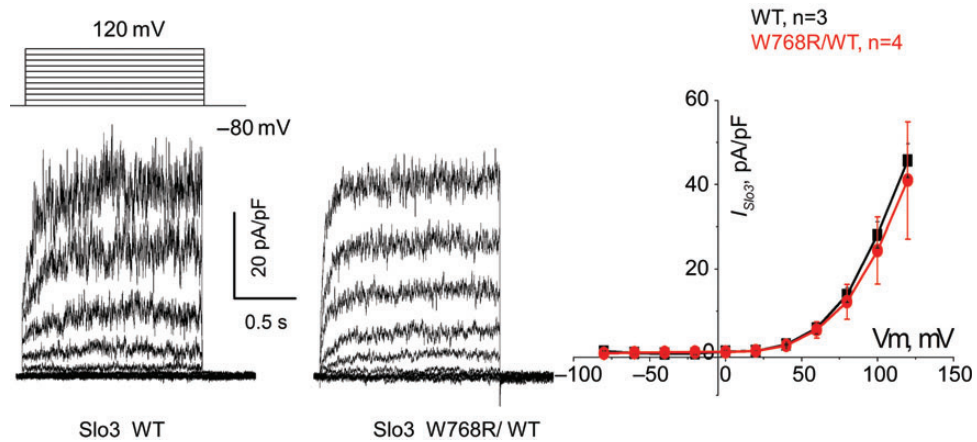

**Supplementary Figure S3** Mutation of Slo3 does not affect the  $K^+$  current from heterologously (HET) expressed Slo3 in HEK293 cells. Representative Slo3 currents in response to indicated voltage steps, recorded from HEK293 cells transfected with a WT Slo3 (left panel) or with a mixture of WT and Mutant (W768R) Slo3 (middle panel). All transfection was done in combination with LRRC52. (Right panel) Voltage to current relationship of  $K^+$  current generated. Error bars indicate SEM. Solutions used in this experiment were all symmetrical  $K^+$  with a pH of 7.4 (pipette and bath) and a free internal calcium concentration of 100 nM and a 100  $\mu\text{M}$  external free calcium concentration.
