# Supplementary material for: Depolarization of sperm membrane potential is a common feature of men with subfertility and is associated with low fertilization rate at IVF
Source: PubMed Central journal article supplement (PMC4871192; doi:10.1093/humrep/dew056), 2016-04-06
Supplement: supp_dew056_dew056supp_table1.pdf [file supp_dew056_dew056supp_table1.pdf]

**Supplementary Table S1 Comparison of candidate loci list to the human sperm proteome.**

| Gene     | Sperm proteome |
|----------|----------------|
| ATPIB1   | Yes            |
| CACNA1C  | No             |
| CACNA1D  | No             |
| CACNA1S  | No             |
| CATSPER1 | Yes            |
| CATSPER2 | Yes            |
| CATSPER3 | No             |
| CATSPER4 | Yes            |
| CATSPERB | Yes            |
| CATSPERD | Yes            |
| CATSPERG | Yes            |
| CAVI     | No             |
| CNBD2    | No             |
| CTNNA1   | Yes            |
| CTNNA2   | No             |
| CTNNA3   | No             |
| CTNNAL1  | No             |
| DMD      | Yes            |
| HSP90AA1 | Yes            |
| HSP90AB1 | Yes            |
| HSP90B1  | Yes            |
| KCNMA1   | No             |
| KCNMB1   | No             |
| KCNMB2   | No             |
| KCNMB3   | No             |
| KCNMB4   | No             |
| KCNU1    | Yes            |
| LRRC52   | Yes            |
| PDZRN3   | No             |
| PDZRN4   | No             |
| PRKACA   | Yes            |
| PRKACB   | No             |
| PRKAR1A  | Yes            |
| PRKAR1B  | Yes            |
| PRKAR2A  | Yes            |
| PRKAR2B  | Yes            |
| PRKG2    | No             |
| PRKX     | Yes            |
| TMCO1    | Yes            |
| VCL      | Yes            |
| YWHAB    | Yes            |
| YWHAE    | Yes            |
| YWHAG    | Yes            |
| YWHAH    | Yes            |
| YWHAZ    | Yes            |

A candidate data list was prepared using the String 10 database (<http://string-db.org/>). This list was built around known Potassium handling systems in sperm, KCNU1, KCNMA1 and LRRC52. While the full list was used to query the variants derived from the exome data set, not all candidates have been reported in the human sperm proteome (Baker MA, Naumovski N, Hetherington L, Weinberg A, Velkov T, Aitken RJ. (2013) Head and flagella subcompartmental proteomic analysis of human spermatozoa. *Proteomics*. **13**:61–74).
