# Supplementary material for: Depolarization of sperm membrane potential is a common feature of men with subfertility and is associated with low fertilization rate at IVF
Source: PubMed Central journal article supplement (PMC4871192; doi:10.1093/humrep/dew056), 2016-04-06
Supplement: supp_dew056_dew056supp_table2.pdf [file supp_dew056_dew056supp_table2.pdf]

**Supplementary Table SII Genetic analysis of Patients D and K.**

| Patient | Gene     | SNP db ID   | Ref | Allele | GMAF     | Zygoty       |
|---------|----------|-------------|-----|--------|----------|--------------|
| D       | CATSPER3 | rs114447625 | G   | A      | A:0.0086 | Heterozygote |
| D       | PRKAR1B  | rs61732492  | T   | C      | C:0.0186 | Heterozygote |
| D       | DMD      | rs1800279   | T   | C      | C:0.0148 | Hemizygote   |
| K       | CATSPER4 | rs12138368  | G   | T      | T:0.0234 | Heterozygote |
| K       | CATSPER2 | rs2614835   | T   | C      | C:0.0004 | Heterozygote |

SNP and Indel identification was performed using a standard GATK workflow following bowtie alignment (McKenna *et al.*, 2010; DePristo *et al.*, 2011; Van der Auwera *et al.*, 2013). The GATK output was filtered against the candidate gene list given in Table I. SNPs/Indels outside coding regions (REFSEQ) and those encoding synonymous changes or with a minor allele frequency greater than 0.05 (as per 1000 Genomes, <http://www.1000genomes.org/>) were excluded.
